# Supplementary material for: IL-6 Receptor Expression on the Surface of T Cells and Serum Soluble IL-6 Receptor Levels in Patients with Microscopic Polyangiitis and Granulomatosis with Polyangiitis
Source: MDPI journal article supplement (doi:10.3390/jcm12227059), 2023-11-13

**Supplementary Figure S1.** IL-6R expression in T cells between patients with active disease and those with inactive disease according to the BVAS cut-off of 3. Comparison of CD3+ (A), CD4+ (B), and CD8+ (C) T cells subsets among the two groups. IL-6R: interleukin-6 receptor; BVAS: Birmingham Vasculitis Activity Score; MFI: mean fluorescence intensity.

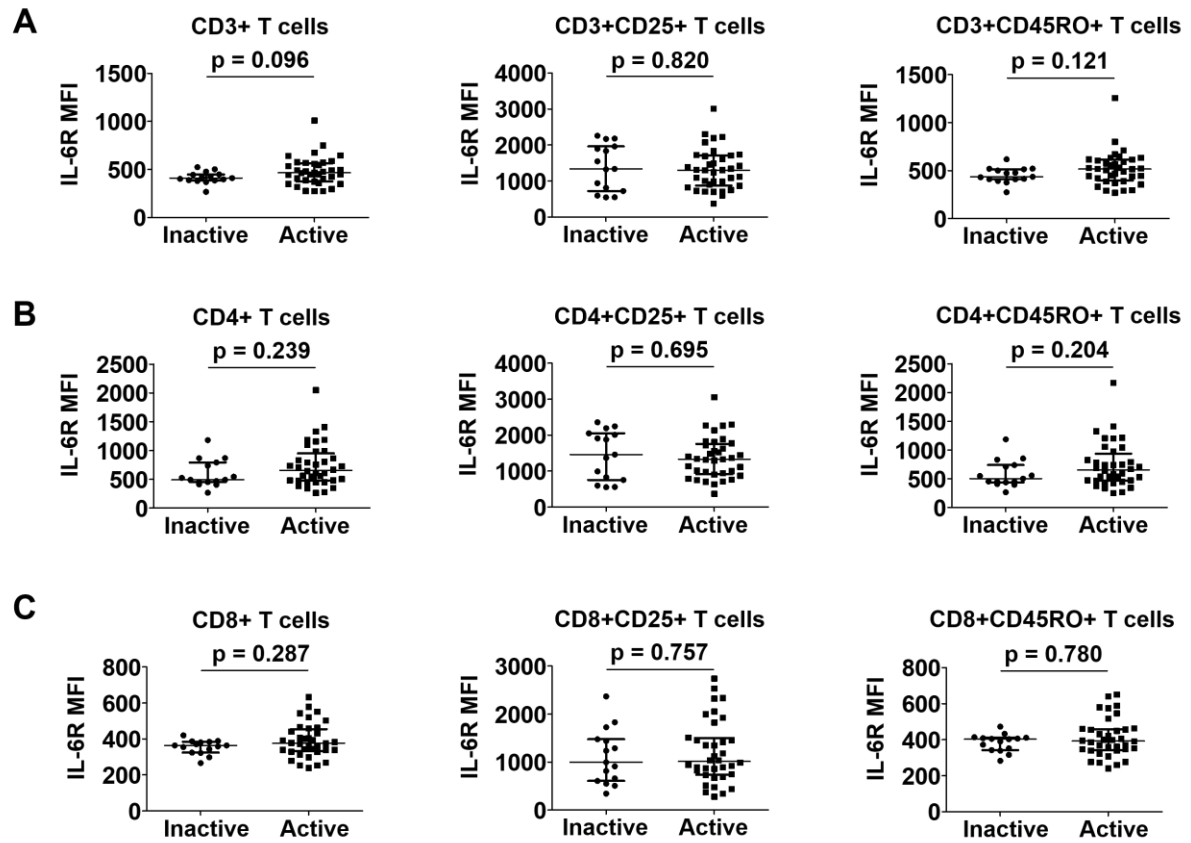

Supplement: s1 [file s1]
